# Supplementary material for: A major lineage of non-tailed dsDNA viruses as unrecognized killers of marine bacteria
Source: Springer Nature journal article supplement (doi:10.1038/nature25474), 2018-01-24
Supplement: 41586_2018_BFnature25474_MOESM1_ESM.pdf [file 41586_2018_BFnature25474_MOESM1_ESM.pdf]

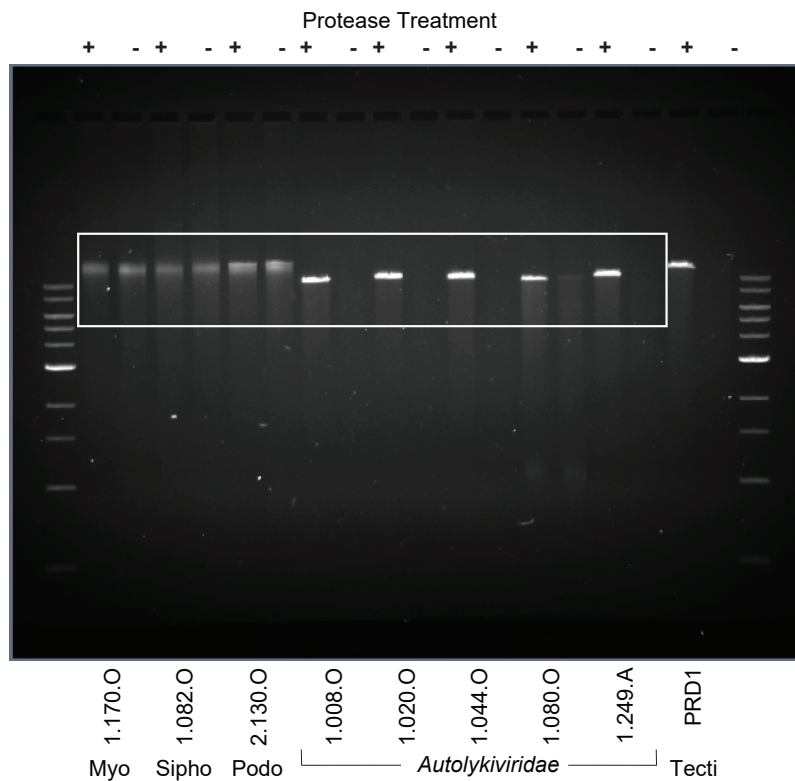

Supplementary Figure 1. Comparison of tailed virus and autolykivirus genome recovery with and without protease treatment. Protease-treated sample load volumes normalized to 50 ng, equal volumes of untreated partner samples in adjacent lanes. White outline indicates cropped region shown in Fig. 3c.
